# Supplementary material for: Movements of the wrist and the risk of carpal tunnel syndrome: a nationwide cohort study using objective exposure measurements
Source: PubMed Central journal article supplement — Occup Environ Med. 2019 Jun 12;76(8):519–26. doi: 10.1136/oemed-2018-105619 (PMC6703125; doi:10.1136/oemed-2018-105619), 2019-06-12
Supplement: oemed-2018-105619supp001.pdf [file oemed-2018-105619supp001.pdf]

## Appendix 1

Table 1. Disco-, industry- and education codes, and their relevant time periods, used to define the 31 different jobs.

| Job              | DISCO codes            |                            |                    | Industry codes                   |                                  |                        |                                  | Education codes    |
|------------------|------------------------|----------------------------|--------------------|----------------------------------|----------------------------------|------------------------|----------------------------------|--------------------|
|                  | 1992-2011 <sup>1</sup> | 2003-2009 <sup>2</sup>     | 2011- <sup>3</sup> | 1993-1996 <sup>5</sup>           | 1997-2003 <sup>6</sup>           | 2004-2007 <sup>7</sup> | 2008- <sup>8</sup>               | 1981- <sup>9</sup> |
| Dental hygienist | 3225                   | 322500<br>322520           | 325100<br>325120   | 85.13.10                         | 85.13.10                         | 85.13.10               | 86.23.00                         |                    |
| Childcare worker | 3320                   | 332000                     | 234300<br>234340   | 85.32.15<br>85.32.25<br>85.32.10 | 85.32.15<br>85.32.25<br>85.32.10 | 85.32.25<br>85.32.15   | 88.91.50<br>88.91.30<br>88.91.20 |                    |
| Postal worker    | 4142                   | 414200<br>414220           | 441200<br>441210   | 64.11.00                         | 64.11.00                         | 64.11.00               | 53.10.00<br>53.20.00             |                    |
| Office worker    | 4115                   | 411500                     | 411000<br>412000   |                                  |                                  |                        |                                  |                    |
| Bank assistant   | 4212                   | 421200<br>421210<br>421220 | 421100             | 65.12.00                         | 65.12.00                         | 65.12.00               | 64.19.00                         |                    |

|                   |      |        |        |          |          |          |          |      |
|-------------------|------|--------|--------|----------|----------|----------|----------|------|
| Kitchen assistant | 5122 | 512200 | 941210 |          |          |          |          |      |
|                   |      | 913240 |        |          |          |          |          |      |
| Nurse, aide       | 5132 | 513200 | 532100 | 85.31.50 | 85.31.50 | 85.31.50 | 87.10.10 |      |
|                   |      | 513210 | 532110 |          |          |          |          |      |
|                   |      |        | 532120 |          |          |          |          |      |
| Hairdresser       | 5141 | 514100 | 514100 | 93.02.10 | 93.02.10 | 93.02.10 | 96.02.10 |      |
|                   |      | 514110 |        |          |          |          |          |      |
| Gartner           | 6112 | 611200 | 611300 | 01.41.20 | 01.41.20 | 01.41.20 | 81.30.00 |      |
|                   |      | 611230 | 611320 |          |          |          |          |      |
| Farmer            | 6130 | 613000 | 612100 |          |          |          |          |      |
| Bricklayer        | 7122 | 712200 | 711210 | 45.25.10 | 45.25.10 | 45.25.10 | 43.99.10 | 4278 |
|                   |      | 712210 |        | 45.21.00 | 45.21.00 | 45.21.00 | 41.20.00 |      |
| Carpenter         | 7124 | 712400 | 711500 | 45.42.00 | 45.42.00 | 45.42.00 | 43.32.00 | 4283 |
|                   |      | 712410 | 711510 | 45.21.00 | 45.21.00 |          | 41.20.00 |      |
|                   |      |        |        |          |          |          | 70.20.00 |      |
| Scaffolder        | 7129 | 712930 | 931350 | 45.25.40 | 45.25.40 | 45.25.40 | 43.99.90 |      |

|                       |      |        |        |          |          |          |          |      |
|-----------------------|------|--------|--------|----------|----------|----------|----------|------|
| Insulator             | 7134 | 713400 | 712400 | 45.32.00 | 45.32.00 | 45.32.00 | 43.29.00 |      |
| Plumber               | 7136 | 713600 | 712600 | 45.33.00 | 45.33.00 | 45.33.00 | 43.22.00 | 4284 |
|                       |      |        |        |          |          |          | 41.20.00 |      |
| House painter         | 7141 | 714100 | 713100 | 45.44.10 | 45.44.10 | 45.44.10 | 43.34.10 | 4274 |
|                       |      | 714110 | 713110 |          |          |          | 41.20.00 |      |
| Smith                 | 7221 | 722100 | 722100 |          |          |          |          |      |
| Car mechanic          | 7231 | 723100 | 723100 | 50.20.10 | 50.20.10 | 50.20.10 | 45.11.20 |      |
|                       |      | 723110 | 723110 | 50.10.20 | 50.10.20 | 50.10.20 | 45.20.10 |      |
|                       |      |        |        | 50.10.10 | 50.10.10 | 50.10.10 | 49.41.00 |      |
|                       |      |        |        | 60.24.10 | 60.24.10 |          |          |      |
| Cardboard worker      | 8143 | 814300 | 817100 |          |          |          |          |      |
| Wood industry worker  | 8240 | 824000 | 817200 | 36.14.10 | 36.14.10 | 20.10.10 | 16.23.00 |      |
|                       |      |        |        | 20.30.20 | 20.30.20 | 20.30.20 | 31.09.00 |      |
|                       |      |        |        | 36.13.00 | 36.13.00 | 36.14.10 | 16.10.00 |      |
|                       |      |        |        | 36.11.10 | 36.11.10 | 36.13.00 |          |      |
|                       |      |        |        | 20.10.10 | 20.10.10 |          |          |      |
|                       |      |        |        | 36.12.00 | 36.12.00 |          |          |      |
| Slaughterhouse worker | 8271 | 827100 | 816000 | 15.11.10 | 15.11.10 | 15.11.10 | 10.11.10 |      |
|                       |      | 827110 | 816010 | 15.11.20 | 15.11.20 | 15.11.20 | 10.11.90 |      |

|                      |      |        |        |          |          |          |          |
|----------------------|------|--------|--------|----------|----------|----------|----------|
| Electronical worker  | 8283 | 828300 | 742100 |          |          |          |          |
| Truck driver         | 8324 | 832460 | 8332   | 60.24.10 | 60.24.10 | 60.24.10 | 49.41.00 |
| Truck/lift operator  | 8334 | 833400 | 8344   |          |          |          |          |
| Cleaning assistant   | 9132 | 913210 | 911210 |          | 74.70.10 | 74.70.10 | 81.21.00 |
|                      |      | 913220 | 911220 |          |          |          |          |
|                      |      | 913230 | 911230 |          |          |          |          |
| Laundry worker       | 9133 | 913300 | 912100 | 93.01.10 | 93.01.10 | 93.01.10 | 96.01.10 |
| Garbage collector    | 9161 | 916100 | 833240 | 90.00.20 | 90.00.20 | 90.02.10 | 38.11.00 |
| Fish industry worker | 9213 | 921300 | 921600 |          |          |          |          |
| Construction worker  | 9312 | 931290 | 931290 | 45.21.00 | 45.21.00 | 45.21.00 | 41.20.00 |
|                      |      |        |        |          |          |          | 43.99.90 |
|                      |      |        |        |          |          |          | 43.99.10 |
| Storage worker       | 9330 | 933010 | 933410 | 52.11.30 | 52.11.30 | 52.11.30 | 47.11.20 |
|                      |      |        |        |          |          |          | 47.19.00 |
|                      |      |        |        | 52.12.10 | 52.12.10 | 52.12.10 | 47.19.00 |
|                      |      |        |        | 52.11.10 | 52.11.10 |          | 46.39.00 |
|                      |      |        |        |          |          | 47.11.30 |          |

<sup>1</sup> DISCO-88, <sup>2</sup> DISCOLØN, <sup>3</sup> DISCO-08, <sup>4</sup> DSE77, <sup>5</sup> DB93, 1., <sup>6</sup> DB93, 2., <sup>7</sup> DB03, <sup>8</sup> DB07, <sup>9</sup> Highest fulfilled education
