# Supplementary material for: Movements of the wrist and the risk of carpal tunnel syndrome: a nationwide cohort study using objective exposure measurements
Source: PubMed Central journal article supplement — Occup Environ Med. 2019 Jun 12;76(8):519–26. doi: 10.1136/oemed-2018-105619 (PMC6703125; doi:10.1136/oemed-2018-105619), 2019-06-12
Supplement: oemed-2018-105619supp002.pdf [file oemed-2018-105619supp002.pdf]

## Appendix 2

Table 1. Diagnose codes used to define potential confounders according to both ICD-8 and ICD-10.

| Potential confounders | ICD-8<br>(1971-1993)                                                                             | ICD-10<br>(1994-2014)                                                |
|-----------------------|--------------------------------------------------------------------------------------------------|----------------------------------------------------------------------|
| Pregnancy             | 650-662                                                                                          | Z37                                                                  |
| Wrist-near fractures  | 813.21<br>813.20<br>813.28<br>813.29<br>814.00<br>814.08<br>814.09<br>815.01<br>815.02<br>815.09 | S52.5<br>S52.6<br>S54.1<br>S62.0<br>S62.1<br>S62.2<br>S62.3<br>S62.4 |
| Hypothyroidism        | 243.99-244.04<br>244.09                                                                          | E00-E03                                                              |
| Reumatoid arthritis   | 712.19<br>712.29<br>712.39<br>712.59                                                             | M05-M06                                                              |
| Diabetes mellitus     | 250<br>250.09                                                                                    | E10-E14                                                              |
| Obesity               | 277.99                                                                                           | E659<br>E66                                                          |
